# Supplementary material for: Interferon-Stimulated Genes—Mediators of the Innate Immune Response during Canine Distemper Virus Infection
Source: PubMed Central journal article supplement (PMC6480560; doi:10.3390/ijms20071620), 2019-04-01
Supplement: ijms-20-01620-s001.pdf [file ijms-20-01620-s001.pdf]

# Supplementary Materials

## Interferon stimulated genes - mediators of the innate immune response during canine distemper virus infection

Daniela Klotz, Ingo Gerhauer

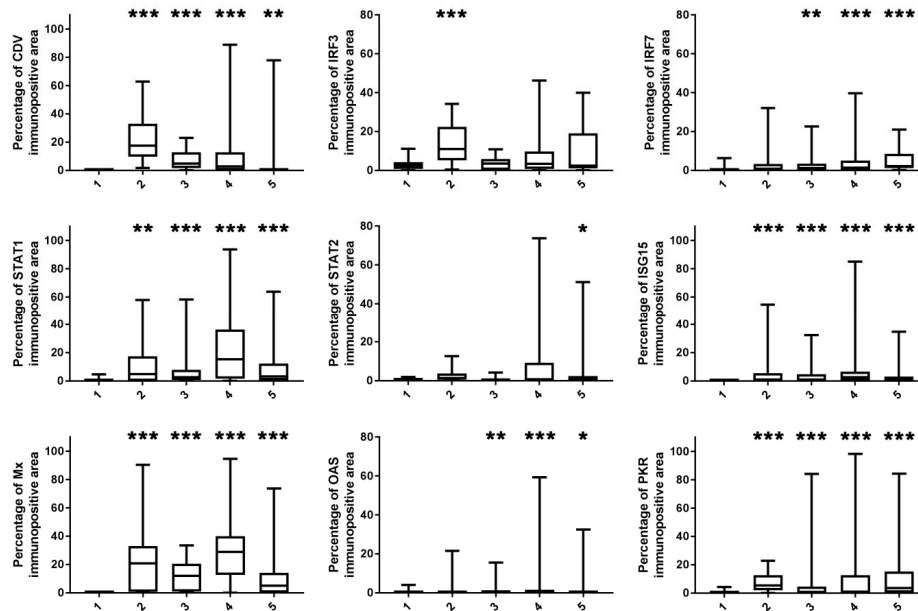

**Figure S1.** Linear representation of Figure 3: Canine distemper virus (CDV) antigen and IRF3, IRF7, STAT1, STAT2, ISG15, MX, OAS and PKR protein expression in the cerebellar white matter. Group 1 are areas in the white matter of control dogs; Group 2 are foci with CDV antigen expression but without histological lesions; Group 3 are acute CDV lesions; Group 4 are subacute foci without inflammation; Group 5 are chronic CDV lesions with inflammation. Shown are the percentages of immunopositive area using box plots and significant differences between the CDV-infected groups 2-5 and the control group 1 based on Kruskal-Wallis-tests and Dunn's multiple comparison tests. \* $P < 0.05$ ; \*\* $P < 0.01$ ; \*\*\* $P < 0.001$ .

**Table S1.** Transcriptional changes of the type I, II and III IFN signaling pathway in canine distemper virus-infected compared to control dogs.

| Probe Set ID                         | Gene Symbol   | Gene Title                                                | Acute       |                | Subacute    |                | Chronic     |                |
|--------------------------------------|---------------|-----------------------------------------------------------|-------------|----------------|-------------|----------------|-------------|----------------|
|                                      |               |                                                           | Fold change | <i>P</i> value | Fold change | <i>P</i> value | Fold change | <i>P</i> value |
| <b>Pattern Recognition Receptors</b> |               |                                                           |             |                |             |                |             |                |
| Cfa.871.2.S1_s_at                    | Ddx58 (RIG-I) | DEAD (Asp-Glu-Ala-Asp) box polypeptide 58                 | 39.07*      | <0.001         | 43.99*      | <0.001         | 11.97*      | 0.004          |
| CfaAffx.10071.1.S1_s_at              | Eif2ak2 (PKR) | Eukaryotic translation initiation factor 2-alpha kinase 4 | 17.71*      | <0.001         | 15.62*      | <0.001         | 6.90*       | 0.004          |
| CfaAffx.16351.1.S1_s_at              | Ifh1 (MDA5)   | Interferon induced with helicase C domain 1               | 22.26*      | <0.001         | 33.76*      | <0.001         | 20.76*      | 0.004          |
| CfaAffx.24815.1.S1_at                | Tlr1          | Toll-like receptor 1                                      | 3.46*       | <0.001         | 4.54*       | <0.001         | 1.84        | 0.866          |
| CfaAffx.13248.1.S1_s_at              | Tlr2          | Toll-like receptor 2                                      | 2.10*       | 0.049          | 2.84*       | 0.002          | 4.52*       | 0.004          |
| CfaAffx.11983.1.S1_at                | Tlr3          | Toll-like receptor 3                                      | 4.76*       | 0.001          | 5.87*       | 0.001          | 8.00*       | 0.004          |
| CfaAffx.601.1.S1_s_at                | Tlr4          | Toll-like receptor 4                                      | 1.80*       | 0.004          | 2.24*       | 0.009          | 1.84        | 0.130          |
| CfaAffx.17705.1.S1_at                | Tlr5          | Toll-like receptor 5                                      | 1.05        | 0.461          | 1.01        | 0.186          | 1.00        | 0.319          |
| Cfa.12377.1.A1_at                    | Tlr7          | Toll-like receptor 7                                      | 2.89*       | <0.001         | 2.83*       | 0.010          | 2.60*       | 0.011          |

|                                                 |        |                                                                                                                |               |        |                |        |               |        |
|-------------------------------------------------|--------|----------------------------------------------------------------------------------------------------------------|---------------|--------|----------------|--------|---------------|--------|
| CfaAffx.18172.1.S1_at                           | Tlr8   | Toll-like receptor 8                                                                                           | 2.32*         | <0.001 | <b>4.44*</b>   | <0.001 | 1.64*         | 0.004  |
| Cfa.824.1.S1_at                                 | Tlr9   | Toll-like receptor 9                                                                                           | -1.05         | 0.266  | -1.03          | 0.890  | -1.06         | 0.134  |
| CfaAffx.24819.1.S1_at                           | Tlr10  | Toll-like receptor 10                                                                                          | 1.67          | 0.077  | 1.42           | 0.159  | 1.73          | 0.855  |
| <b>Interferon Regulatory Factors</b>            |        |                                                                                                                |               |        |                |        |               |        |
| CfaAffx.2202.1.S1_s_at                          | Irf1   | Interferon regulatory factor 1                                                                                 | <b>14.73*</b> | <0.001 | <b>30.13*</b>  | <0.001 | <b>13.98*</b> | 0.002  |
| CfaAffx.12486.1.S1_s_at                         | Irf2   | Interferon regulatory factor 2                                                                                 | 1.39          | 0.082  | 1.53           | 0.053  | 1.26          | 0.233  |
| Cfa.18322.1.S1_at                               | Irf3   | Interferon regulatory factor 3                                                                                 | 1.17          | 0.662  | 1.23           | 0.983  | 1.32          | 0.752  |
| CfaAffx.14437.1.S1_at                           | Irf4   | Interferon regulatory factor 4                                                                                 | 1.00          | >0.999 | 1.00           | >0.999 | 3.00*         | 0.029  |
| CfaAffx.3326.1.S1_s_at                          | Irf5   | Interferon regulatory factor 5                                                                                 | 1.06          | 0.074  | 1.03           | 0.044  | 1.71          | 0.200  |
| CfaAffx.18603.1.S1_s_at                         | Irf6   | Interferon regulatory factor 6                                                                                 | 1.01          | 0.838  | -1.01          | 0.838  | -1.01         | >0.999 |
| CfaAffx.10779.1.S1_at                           | Irf7   | Interferon regulatory factor 7                                                                                 | <b>45.42*</b> | <0.001 | <b>113.54*</b> | <0.001 | <b>24.65*</b> | 0.002  |
| Cfa.9365.1.A1_at                                | Irf8   | Interferon regulatory factor 8                                                                                 | 2.00*         | 0.001  | 2.02*          | 0.001  | 2.74*         | 0.004  |
| CfaAffx.16794.1.S1_s_at                         | Nfkb1  | Nuclear factor of kappa light polypeptide gene enhancer in B cells 1, p105                                     | 1.23          | 0.104  | 1.59*          | 0.010  | 1.39          | 0.070  |
| CfaAffx.20636.1.S1_s_at                         | Rela   | v-rel reticuloendotheliosis viral oncogene homolog A (avian)                                                   | -1.04         | 0.878  | -1.01          | >0.999 | -1.23         | 0.191  |
| <b>Type I/II/III Interferons</b>                |        |                                                                                                                |               |        |                |        |               |        |
| CfaAffx.3402.1.S1_at                            | Ifna1  | interferon alpha-1/2-like                                                                                      | 1.00          | >0.999 | 1.00           | >0.999 | 1.00          | >0.999 |
| CfaAffx.3390.1.S1_at                            | Ifna2  | interferon alpha-2-like                                                                                        | -1.01         | 0.559  | -1.01          | 0.529  | -1.01         | >0.999 |
| Cfa.16250.1.S1_x_at                             | Ifna5° | Interferon alpha 5                                                                                             | 1.01          | 0.294  | 1.00           | >0.999 | 1.00          | >0.999 |
| CfaAffx.3389.1.S1_at                            | Ifnb1  | Interferon beta 1, fibroblast                                                                                  | -1.00         | >0.999 | 1.01           | 0.441  | -1.00         | >0.999 |
| CfaAffx.3408.1.S1_at                            | Ifne   | Interferon epsilon                                                                                             | 1.00          | >0.999 | 1.00           | >0.999 | 1.00          | >0.999 |
| Cfa.3900.1.S1_s_at                              | Ifng   | Interferon gamma                                                                                               | -1.00         | >0.999 | 1.01           | 0.098  | 1.02          | 0.004  |
| CfaAffx.3468.1.S1_at                            | Ifnk   | Interferon kappa                                                                                               | -1.00         | >0.999 | -1.00          | >0.999 | -1.00         | >0.999 |
| CfaAffx.9324.1.S1_at                            | Ifnl1  | Interferon lambda 1                                                                                            | 1.00          | >0.999 | 1.00           | >0.999 | 1.00          | >0.999 |
| <b>Type I/II/III Interferon Receptors</b>       |        |                                                                                                                |               |        |                |        |               |        |
| Cfa.19476.1.S1_s_at                             | Ifnar1 | interferon alpha/beta receptor 1-like                                                                          | 1.33          | 0.383  | 1.53*          | 0.005  | -1.14         | 0.470  |
| Cfa.10009.1.A1_at                               | Ifnar2 | interferon (alpha, beta and omega) receptor 2                                                                  | 1.21          | 0.082  | 1.52*          | 0.010  | 1.25          | 0.136  |
| CfaAffx.1357.1.S1_at                            | Ifngr1 | Interferon gamma receptor 1                                                                                    | 1.38          | 0.064  | 1.31           | 0.151  | 1.42          | 0.734  |
| Cfa.14847.1.A1_s_at                             | Ifngr2 | Interferon gamma receptor 2-like                                                                               | 1.07          | 0.678  | 1.20           | 0.436  | 1.51*         | 0.048  |
| CfaAffx.20153.1.S1_at                           | Ifnlr1 | Interferon lambda receptor 1                                                                                   | 1.05          | 0.294  | 1.00           | >0.999 | 1.01          | 0.200  |
| <b>Signal Transducers</b>                       |        |                                                                                                                |               |        |                |        |               |        |
| CfaAffx.18651.1.S1_at                           | Irf9   | Interferon regulatory factor 9                                                                                 | <b>8.16*</b>  | <0.001 | <b>11.44*</b>  | <0.001 | <b>3.38*</b>  | 0.002  |
| Cfa.15782.2.S1_s_at                             | Jak1   | Janus kinase 1                                                                                                 | 1.12          | 0.796  | -1.27          | 0.468  | -1.22         | 0.470  |
| Cfa.16973.1.S1_at                               | Jak2   | Janus kinase 2                                                                                                 | 1.84          | 0.796  | 2.34           | 0.468  | 2.17          | 0.470  |
| CfaAffx.23353.1.S1_at                           | Jak3   | Janus kinase 3                                                                                                 | 1.00*         | 0.002  | 1.00*          | <0.001 | 1.00*         | 0.009  |
| CfaAffx.28878.1.S1_at                           | Socs1  | Suppressor of cytokine signaling 1                                                                             | 1.00          | >0.999 | 1.00           | >0.999 | 1.00          | >0.999 |
| CfaAffx.10255.1.S1_at                           | Socs2  | Suppressor of cytokine signaling 2                                                                             | -1.03         | 0.903  | -2.50*         | 0.002  | 1.20          | 0.295  |
| Cfa.3905.1.S1_at                                | Socs3  | Suppressor of cytokine signaling 3                                                                             | 1.11          | 0.006  | 1.01*          | 0.020  | -1.00         | 0.40   |
| Cfa.7833.1.A1_s_at                              | Socs4  | Suppressor of cytokine signaling 4                                                                             | -1.13         | 0.663  | -1.41          | 0.450  | 1.33          | 0.306  |
| Cfa.10850.1.A1_s_at                             | Socs5  | Suppressor of cytokine signaling 5                                                                             | -1.04         | 0.603  | -1.15          | 0.145  | -1.18         | 0.154  |
| CfaAffx.25443.1.S1_at                           | Socs7  | Suppressor of cytokine signaling 7                                                                             | 1.06          | 0.182  | 1.02           | 0.367  | -1.11*        | 0.004  |
| Cfa.18084.1.S1_s_at                             | Stat1  | signal transducer and activator of transcription 1-like /// signal transducer and activator of transcription 4 | <b>12.03*</b> | <0.001 | <b>19.19*</b>  | <0.001 | <b>7.12*</b>  | 0.004  |
| CfaAffx.27105.1.S1_s_at                         | Stat2  | Signal transducer and activator of transcription 2                                                             | 3.21*         | <0.001 | <b>4.57*</b>   | <0.001 | 2.63*         | 0.004  |
| CfaAffx.23466.1.S1_s_at                         | Stat3  | signal transducer and activator of transcription 3 (acute-phase response factor)                               | 1.85*         | 0.001  | 2.01*          | <0.001 | 1.50*         | 0.048  |
| Cfa.2683.1.A1_at                                | Stat5A | signal transducer and activator of transcription 5A                                                            | 1.20*         | 0.001  | 1.42*          | <0.001 | 1.18*         | 0.009  |
| CfaAffx.23894.1.S1_at                           | Stat5B | signal transducer and activator of transcription 5B                                                            | 1.12          | 0.273  | 1.37*          | 0.005  | 1.16          | 0.196  |
| Cfa.15552.1.A1_at                               | Stat6  | signal transducer and activator of transcription 6, interleukin-4 induced                                      | -1.05         | 0.825  | 1.09           | 0.397  | -1.43*        | 0.044  |
| CfaAffx.27321.1.S1_s_at                         | Tyk2   | Tyrosine kinase 2                                                                                              | 1.00          | >0.999 | 1.00           | >0.999 | 1.00          | >0.999 |
| <b>Interferon-Dependent Antiviral Effectors</b> |        |                                                                                                                |               |        |                |        |               |        |

|                         |                 |                                                                     |                |        |                |        |                |        |
|-------------------------|-----------------|---------------------------------------------------------------------|----------------|--------|----------------|--------|----------------|--------|
| CfaAffx.26268.1.S1_at   | Adar            | Adenosine deaminase, RNA-specific                                   | 1.44           | 0.061  | 1.92*          | 0.001  | -1.01          | 0.820  |
| CfaAffx.2928.1.S1_at    | Apobec3h        | Apolipoprotein B mRNA editing enzyme, catalytic polypeptide-like 3H | 1.05           | 0.131  | 1,66           | 0.067  | 1.42           | 0.207  |
| Cfa.6729.1.A1_at        | Cldn4           | Claudin 4                                                           | -1.17          | 0.184  | -1.01          | 0.666  | -1.07          | 0.310  |
| Cfa.16947.1.A1_at       | Ch25h           | Cholesterol 25-hydroxylase                                          | <b>4.12*</b>   | <0.001 | <b>4.68*</b>   | 0.001  | 2.48           | 0.101  |
| CfaAffx.22274.1.S1_x_at | Ddit4           | DNA-damage-inducible transcript 4                                   | <i>1.54*</i>   | 0.046  | 1,67           | 0.050  | 1.22           | 0.222  |
| Cfa.17424.1.S1_s_at     | Ddx17           | DEAD (Asp-Glu-Ala-Asp) box polypeptide 17                           | -1.13          | 0.202  | -1.17          | 0.127  | -1.13          | 0.664  |
| CfaAffx.14223.1.S1_at   | Ddx60           | DEAD (Asp-Glu-Ala-Asp) box polypeptide 60                           | <b>25.50*</b>  | <0.001 | <b>39.85*</b>  | <0.001 | <b>31.32*</b>  | 0.002  |
| CfaAffx.30940.1.S1_s_at | Gbp1            | Guanylate binding protein 1                                         | <b>30.46*</b>  | <0.001 | <b>88.40*</b>  | <0.001 | <b>55.46*</b>  | 0.002  |
| CfaAffx.14369.1.S1_at   | Hpse            | Heparanase                                                          | 1.01           | 0.932  | 1.26           | 0.767  | <b>1.28*</b>   | 0.037  |
| Cfa.20456.1.S1_s_at     | Ifi6            | interferon, alpha-inducible protein 6                               | <b>4.18*</b>   | <0.001 | <b>6.45*</b>   | <0.001 | <b>2.57*</b>   | 0.004  |
| CfaAffx.18191.1.S1_s_at | IFi16           | interferon, gamma-inducible protein 16                              | <b>16.05*</b>  | <0.001 | <b>19.31*</b>  | <0.001 | <b>15.43*</b>  | 0.004  |
| Cfa.16440.1.S1_at       | Ifi35           | Interferon-induced protein 35                                       | <b>9.72*</b>   | <0.001 | <b>17.19*</b>  | <0.001 | <b>9.32*</b>   | 0.004  |
| Cfa.18904.1.S1_s_at     | IFI44           | Interferon-induced protein 44                                       | <b>69.67*</b>  | <0.001 | <b>78.05*</b>  | <0.001 | <b>23.72*</b>  | 0.004  |
| CfaAffx.31150.1.S1_at   | Ifi44l          | Interferon-induced protein 44 like                                  | <b>275.63*</b> | <0.001 | <b>419.93*</b> | <0.001 | <b>109.23*</b> | 0.004  |
| CfaAffx.15121.1.S1_at   | Ifit1 (Isg56)   | Interferon-induced protein with tetratricopeptide repeats 1         | <b>93.57*</b>  | <0.001 | <b>179.05*</b> | <0.001 | <b>47.07*</b>  | 0.004  |
| Cfa.9758.1.A1_at        | Ifit2 (Isg54)   | Interferon-induced protein with tetratricopeptide repeats 2         | <b>39.89*</b>  | <0.001 | <b>77.21*</b>  | <0.001 | <b>25.89*</b>  | 0.004  |
| Cfa.19536.1.S1_at       | Ifit5           | interferon-induced protein with tetratricopeptide repeats 5         | <i>2.75*</i>   | <0.001 | <b>4.41*</b>   | <0.001 | <i>1.91*</i>   | 0.004  |
| CfaAffx.15732.1.S1_at   | Ifitm10         | Interferon induced transmembrane protein 10                         | -1.05          | 0.954  | -1.19          | 0.145  | -1.13          | 0.391  |
| Cfa.10757.1.S1_at       | Isg15           | ISG15 ubiquitin-like modifier                                       | <b>590.52*</b> | <0.001 | <b>928.35*</b> | <0.001 | <b>245.71*</b> | 0.004  |
| CfaAffx.17917.1.S1_at   | Isg20           | Interferon-stimulated protein                                       | <b>4.62*</b>   | <0.001 | <b>8.05*</b>   | <0.001 | 2.87           | 0.165  |
| CfaAffx.21280.1.S1_at   | Map3k14 (Nik)   | Mitogen-activated protein kinase kinase kinase 14                   | 1.00           | >0.999 | 1.00           | >0.999 | 1.00           | >0.999 |
| CfaAffx.20794.1.S1_at   | Mov10           | Moloney leukemia virus 10                                           | <i>3.57*</i>   | <0.001 | <b>5.21*</b>   | <0.001 | <i>3.25*</i>   | 0.004  |
| CfaAffx.15920.1.S1_s_at | Mx1             | Myxovirus (influenza virus) resistance 1                            | <b>11.44*</b>  | <0.001 | <b>15.98*</b>  | <0.001 | <b>7.35*</b>   | 0.004  |
| Cfa.3609.1.S1_s_at      | Mx2             | Myxovirus (influenza virus) resistance 2                            | <b>47.68*</b>  | <0.001 | <b>147.59*</b> | <0.001 | <b>38.43*</b>  | 0.004  |
| CfaAffx.6906.1.S1_at    | Nampt (Pbef1)   | Nicotinamide phosphoribosyltransferase                              | <i>1.36*</i>   | 0.027  | <i>1.70*</i>   | 0.002  | 1.64           | 0.101  |
| Cfa.20355.1.S1_at       | NT5C3A          | 5'-nucleotidase, cytosolic IIIA                                     | <i>2.08*</i>   | <0.001 | <i>2.93*</i>   | <0.001 | <i>1.43*</i>   | 0.009  |
| Cfa.20525.1.S1_at       | NT5C3B          | 5'-nucleotidase, cytosolic IIIB                                     | <i>-1.10*</i>  | 0.036  | <i>-1.20*</i>  | 0.041  | -1.12          | 0.255  |
| Cfa.9330.1.A1_at        | Oas1            | 2'-5' oligoadenylate synthetase 1                                   | <b>42.18*</b>  | <0.001 | <b>71.15*</b>  | <0.001 | <b>10.97*</b>  | 0.004  |
| CfaAffx.14116.1.S1_at   | Oas2            | 2'-5' oligoadenylate synthetase 2                                   | <b>80.24*</b>  | <0.001 | <b>173.57*</b> | <0.001 | <b>34.76*</b>  | 0.004  |
| CfaAffx.14109.1.S1_s_at | Oas3            | 2'-5' oligoadenylate synthetase 3                                   | <i>1.27*</i>   | 0.004  | <i>1.51*</i>   | 0.002  | 1.16           | 0.319  |
| CfaAffx.16440.1.S1_at   | Oasl            | 2'-5' oligoadenylate synthetase-like                                | <b>44.47*</b>  | <0.001 | <b>118.26*</b> | <0.001 | <b>33.62*</b>  | 0.002  |
| CfaAffx.16447.1.S1_s_at | Oasl2           | 2'-5' oligoadenylate synthetase-like 2                              | <b>4.42*</b>   | <0.001 | <b>8.14*</b>   | <0.001 | <i>2.61*</i>   | 0.009  |
| CfaAffx.9374.1.S1_at    | P2ry6           | Pyrimidinergic receptor P2Y, G-protein coupled, 6                   | 1.35           | 0.382  | 1.02           | 0.872  | 2.02           | 0.519  |
| Cfa.14949.1.A1_s_at     | PHF15           | PHD finger protein 15                                               | <i>1.73*</i>   | 0.030  | <i>2.31*</i>   | <0.001 | <i>2.13*</i>   | 0.022  |
| CfaAffx.27337.1.S1_at   | Pml (Trim19)    | Promyelocytic leukemia                                              | -1.04          | 0.778  | 1.07           | 0.731  | 1.08           | 0.275  |
| CfaAffx.20321.1.S1_at   | Rnasel          | Ribonuclease L (2', 5'-oligoisoadenylate synthetase-dependent)      | <b>5.88*</b>   | <0.001 | <b>9.07*</b>   | <0.001 | <i>3.29*</i>   | 0.004  |
| CfaAffx.5863.1.S1_at    | Rsad2 (Viperin) | Radical S-adenosyl methionine domain containing 2                   | <b>10.80*</b>  | <0.001 | <b>25.01*</b>  | <0.001 | <i>3.17*</i>   | 0.002  |
| CfaAffx.21443.1.S1_at   | Rtp4            | Receptor transporter protein 4                                      | <b>24.43*</b>  | <0.001 | <b>27.91*</b>  | <0.001 | <b>9.71*</b>   | 0.004  |
| Cfa.9597.1.S1_at        | Samhd1          | SAM domain and HD domain, 1                                         | <i>1.40*</i>   | <0.001 | <i>1.90*</i>   | 0.018  | 1.16           | 0.136  |
| CfaAffx.25103.1.S1_at   | Slc15a3         | Solute carrier family 15, member 3                                  | 1.00           | 0.294  | 1.00           | 0.333  | 1.00           | 0.200  |

|                                                  |                   |                                                                                                                         |               |        |                |        |               |       |
|--------------------------------------------------|-------------------|-------------------------------------------------------------------------------------------------------------------------|---------------|--------|----------------|--------|---------------|-------|
| CfaAffx.13398.1.S1_at                            | Slc25a28          | Solute carrier family 25, member 28                                                                                     | -1.11         | 0.109  | 1.09           | 0.485  | -1.19         | 0.152 |
| CfaAffx.29066.1.S1_at                            | Ssbp3             | Single-stranded DNA binding protein 3                                                                                   | -1.39         | 0.061  | -1.61          | 0.524  | -1.81         | 0.119 |
| CfaAffx.833.1.S1_at                              | Trex1 (Atrip)     | Three prime repair exonuclease 1 (ATR interacting protein)                                                              | 1.28          | 0.109  | <i>1.83*</i>   | 0.005  | 1.14          | 0.468 |
| CfaAffx.26603.1.S1_s_at                          | Trim25            | Tripartite motif-containing 25                                                                                          | 1.00          | 0.191  | <i>1.14*</i>   | 0.005  | 1.08          | 0.200 |
| Cfa.18920.1.S1_s_at                              | Sun2 (Unc84b)     | Sad1 and UNC84 domain containing 2                                                                                      | 1.10          | 0.524  | <i>-1.12*</i>  | 0.050  | 1.06          | 0.574 |
| CfaAffx.20922.1.S1_at                            | Zbtb16 (Plzf)     | zinc finger and BTB domain containing 16                                                                                | 1.57          | 0.104  | 1.69           | 0.103  | 1.72          | 0.180 |
| <b>Major Histocompatibility Genes Class I/II</b> |                   |                                                                                                                         |               |        |                |        |               |       |
| Cfa.1333.3.S1_a_at                               | Cd74              | CD74 antigen (invariant polypeptide of major histocompatibility complex, class II antigen-associated)                   | <b>7.30*</b>  | <0.001 | <b>9.89*</b>   | <0.001 | <b>6.06*</b>  | 0.009 |
| Cfa.20996.1.S1_at                                | DLA-12 (MHC I)    | MHC class I DLA-12                                                                                                      | <b>6.72*</b>  | <0.001 | <b>10.64*</b>  | <0.001 | <b>4.94*</b>  | 0.004 |
| CfaAffx.1704.1.S1_s_at                           | DLA-64 (MHC I)    | MHC class I DLA-64                                                                                                      | <b>24.52*</b> | <0.001 | <b>37.51*</b>  | <0.001 | <b>18.07*</b> | 0.004 |
| Cfa.17933.1.S1_s_at                              | DLA-79 (MHC I)    | MHC class Ib                                                                                                            | <b>10.49*</b> | <0.001 | <b>36.99*</b>  | <0.001 | <b>9.17*</b>  | 0.004 |
| Cfa.280.1.S1_at                                  | DLA-88 (MHC I)    | MHC class I DLA-88                                                                                                      | <b>17.87*</b> | 0.018  | <b>135.55*</b> | <0.001 | -4.80         | 0.336 |
| Cfa.18297.1.S1_at                                | DLA-DMA (MHC II)  | major histocompatibility complex, class II, DM alpha                                                                    | 3.86*         | <0.001 | <b>6.35*</b>   | <0.001 | <b>4.48*</b>  | 0.009 |
| Cfa.21014.2.S1_s_at                              | DLA-DMB (MHC II)  | major histocompatibility complex, class II, DM beta                                                                     | <b>4.20*</b>  | <0.001 | <b>5.88*</b>   | 0.007  | <b>4.88*</b>  | 0.018 |
| CfaAffx.2154.1.S1_at                             | DLA-DOB (MHC II)  | major histocompatibility complex, class II, DO beta                                                                     | <i>1.41*</i>  | 0.013  | <i>2.46*</i>   | <0.001 | 1.07          | 0.055 |
| Cfa.182.1.S2_at                                  | DLA-DQA1 (MHC II) | major histocompatibility complex, class II, DQ alpha 1                                                                  | <b>12.19*</b> | <0.001 | <b>30.97*</b>  | <0.001 | <b>17.87*</b> | 0.004 |
| CfaAffx.2152.1.S1_s_at                           | DLA-DQB1 (MHC II) | major histocompatibility complex, class II, DQ beta 1 /// HLA class II histocompatibility antigen, DQ beta 2 chain-like | <b>13.34*</b> | <0.001 | <b>22.98*</b>  | <0.001 | <b>14.09*</b> | 0.004 |
| Cfa.6456.1.S1_at                                 | DLA-DRA (MHC II)  | MHC class II DR alpha chain                                                                                             | <b>5.27*</b>  | <0.001 | <b>8.34*</b>   | 0.003  | <b>6.78*</b>  | 0.009 |
| Cfa.181.1.S1_at                                  | DLA-DRB1 (MHC II) | MHC class II DLA DRB1 beta chain                                                                                        | <b>6.65*</b>  | <0.001 | <b>9.77*</b>   | 0.001  | <b>7.64*</b>  | 0.004 |

Shown are fold changes in acute, subacute and chronic lesions including *P* values based on Mann-Whitney U tests. Significant fold changes are shown in italics letters and marked with an asterisk. Bold letters indicate fold changes higher than 4.0. °Canine IFNA5 is identical to canine IFNA3, IFNA4, IFNA6, and IFNA8 as described in Klotz et al. (2017).

Klotz, D.; Baumgärtner, W.; Gerhauser, I., Type I interferons in the pathogenesis and treatment of canine diseases. *Vet. Immunol. Immunopathol.* **2017**, 191, 80-93.

**Table S2.** Anamnestic data of the investigated dogs.

| Animal Number | Breed                 | Infection Status | Age       | Gender  |
|---------------|-----------------------|------------------|-----------|---------|
| 1             | Bobtail               | CDV              | 4 months  | female  |
| 2             | Mix                   | CDV              | 5 months  | female  |
| 3             | West Highland Terrier | CDV              | 3 months  | unknown |
| 4             | Maltese               | CDV              | 5 months  | male    |
| 5             | Siberian Husky        | CDV              | 12 months | male    |
| 6             | Miniature Pinscher    | CDV              | 7 years   | male    |
| 7             | Mix                   | CDV              | 46 months | female  |
| 8             | Podenco               | CDV              | juvenile  | female  |
| 9             | Mix                   | CDV              | 12 months | female  |
| 10            | English Bulldog       | CDV              | 3 months  | female  |

|    |                      |         |           |         |
|----|----------------------|---------|-----------|---------|
| 11 | Mix                  | CDV     | 2 months  | male    |
| 12 | Mix                  | CDV     | unknown   | female  |
| 13 | Mix                  | CDV     | unknown   | male    |
| 14 | Mix                  | CDV     | unknown   | male    |
| 15 | Chihuahua            | CDV     | 36 months | female  |
| 16 | Bernese Mountain dog | Control | 15 months | male    |
| 17 | French Bulldog       | Control | 2 months  | male    |
| 18 | Rottweiler           | Control | 6 months  | female  |
| 19 | Beagle               | Control | 20 months | male    |
| 20 | Beagle               | Control | 17 months | female  |
| 21 | Beagle               | Control | unknown   | unknown |
